# Supplementary material for: Computerized text and voice analysis - a quantitative single case study of seven chronically schizophrenic patients in art therapy
Source: Research Square preprint supplement (doi:10.21203/rs.3.rs-1753947/v3), 2022-09-01
Supplement: Supplementary file 1 [file 9c9644071938224bae0f2953.docx]

**SUPPLEMENTARY INFORMATION (Figures)**

**BF.1 Scree-test for 61 parameters of LIWC2015**


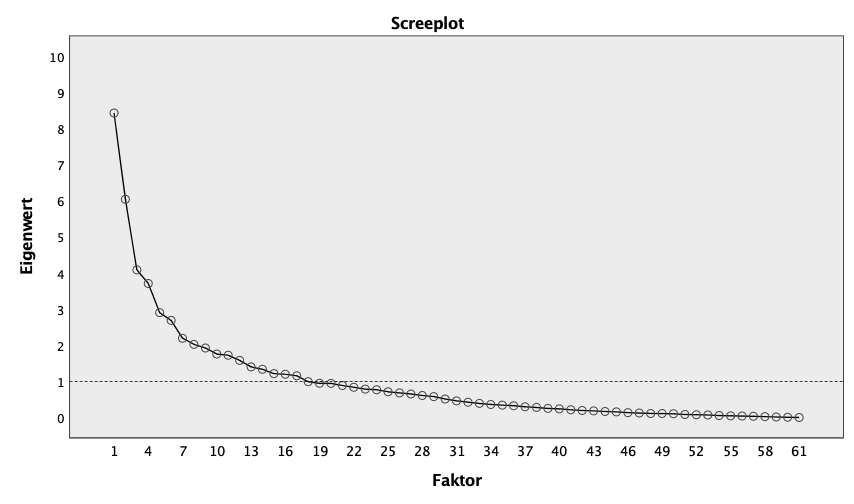


**(intrinsic value)**

**(factor)**

Figure BF.1

Scree-test for 61 parameters of LIWC2015.

**BF.2 Scree-test for 52 parameters of category_v2_scores**


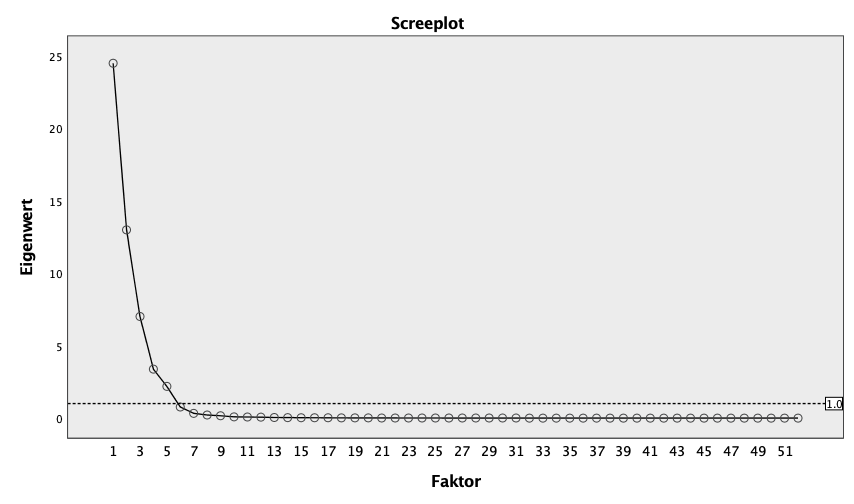


**(factor)**

**(intrinsic value)**

Figure BF.2

Scree-test for 52 parameters of category_v2_scores.
